# Supplementary material for: Structural features of influenza A virus panhandle RNA enabling the activation of RIG-I independently of 5′-triphosphate
Source: PubMed Central journal article supplement — Nucleic Acids Res. 2016 Jun 10;44(17):8407–16. doi: 10.1093/nar/gkw525 (PMC5041458; doi:10.1093/nar/gkw525), 2016-06-10
Supplement: supp_gkw525_nar-00974-r-2016-File009.pdf [file supp_gkw525_nar-00974-r-2016-File009.pdf]

## Supplementary Data

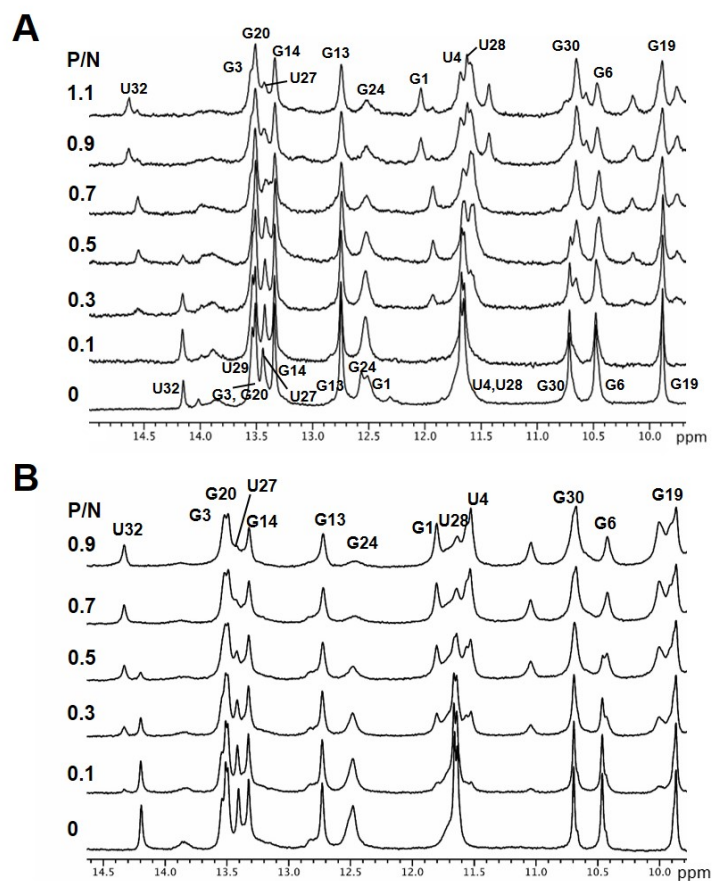

**Figure S1.** (A) Imino proton NMR spectra of 5'-PPP-iav upon titration with RIG-I CTD. P/N, protein-to-RNA molar ratios. (B) Imino proton NMR spectra of free and bound 5'-OH-iav RNA at various protein-to-RNA (P/N) ratios.

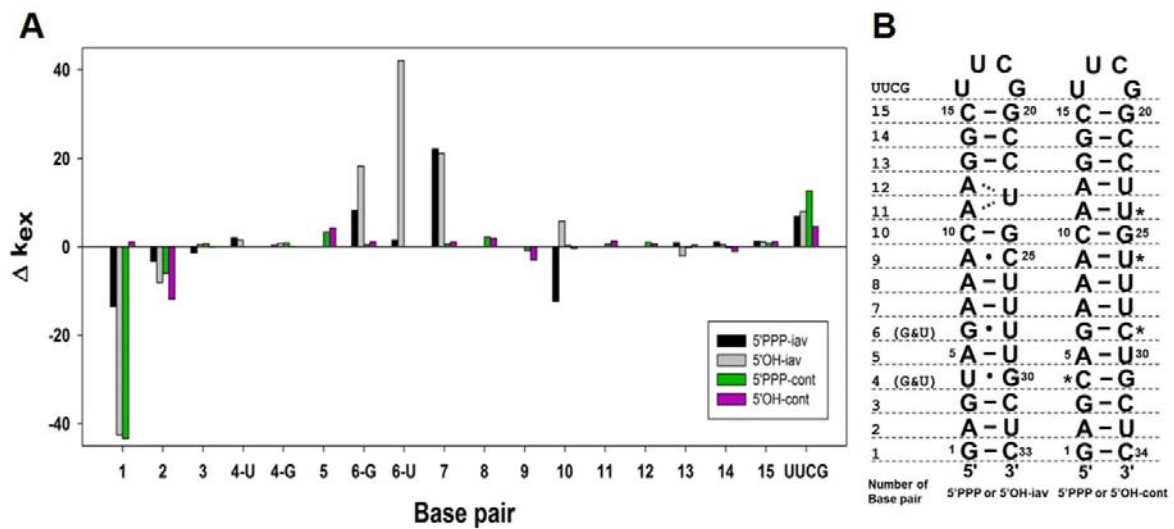

**Figure S2.** (A) Difference between  $k_{ex}$  values of free RNAs and RIG-I CTD-bound RNAs ( $\Delta k_{ex}$ ). RNAs are 5'-PPP-iav, 5'-OH-iav, 5'-PPP-cont, and 5'-OH-cont. (B) Numbering of base pairs in sequences of iav RNAs and cont RNAs

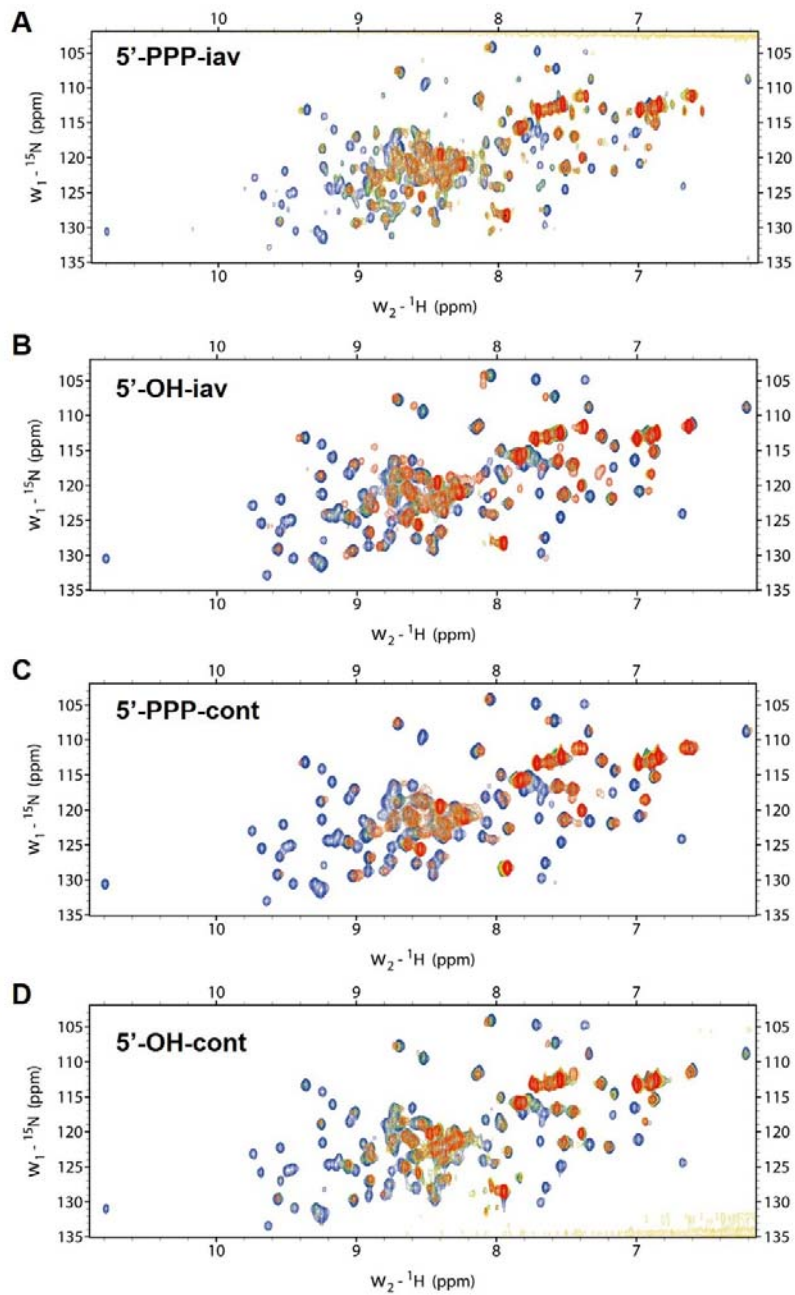

**Figure S3.** NMR titration of  $^{15}\text{N}$ -labeled RIG-I CTD with iav RNAs and cont RNAs.  $^{15}\text{N}$ - $^1\text{H}$ -HSQC spectra recorded at variant RNA-to-Protein (N/P) molar ratios were overlapped (blue, N/P=0; green, N/P=0.25; yellow, N/P=0.5; red, N/P=1).

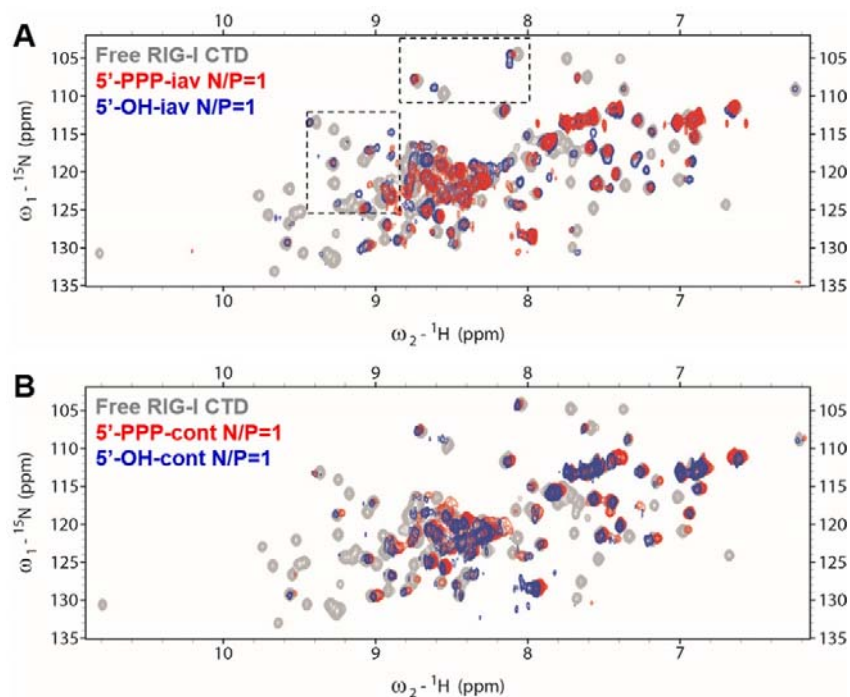

**Figure S4.** NMR titration of  $^{15}\text{N}$ -labeled RIG-I CTD with iav RNAs and cont RNAs. **(A)**  $^{15}\text{N}$ - $^1\text{H}$ -HSQC spectra of free RIG-I CTD, 5'-PPP-iav/RIG-I CTD complex, and 5'-OH-iav/RIG-I CTD complex (gray, free protein; red, 1:1 complex with 5'-PPP-iav; blue, 1:1 complex with 5'-OH-iav). Amide protons in the dotted boxes revealed dramatic changes in chemical shift upon RIG-I CTD binding to 5'-OH-iav. N/P indicates RNA-to-Protein molar ratios. **(B)**  $^{15}\text{N}$ - $^1\text{H}$ -HSQC spectra of free RIG-I CTD, 5'-PPP-cont/RIG-I CTD complex, and 5'-OH-cont/RIG-I CTD complex (gray, free protein; red, 1:1 complex with 5'-PPP-cont; blue, 1:1 complex with 5'-OH-cont).

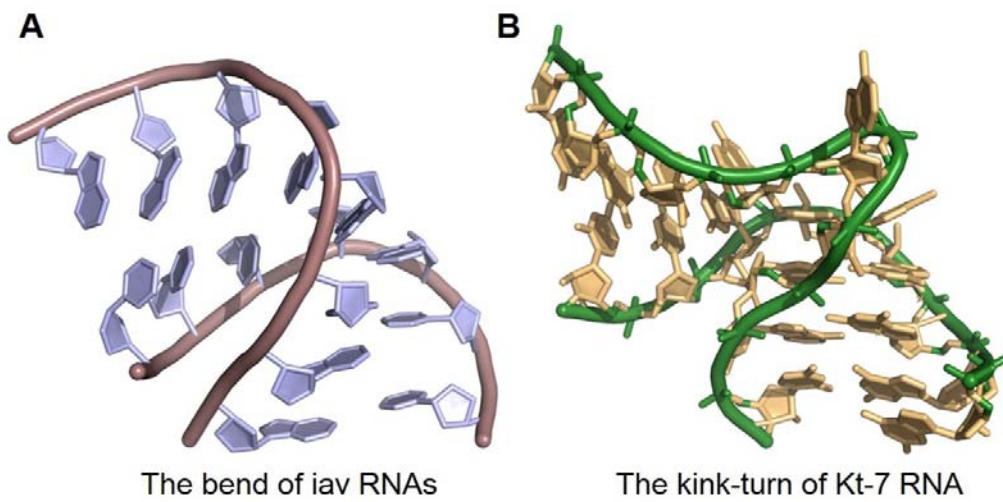

**Figure S5.** (A) The bend structure of iav RNAs (PDB: 1JO7). (B) The kink-turn structure of *H. marismortui* ribosomal Kt-7 RNA (PDB: 4CS1).

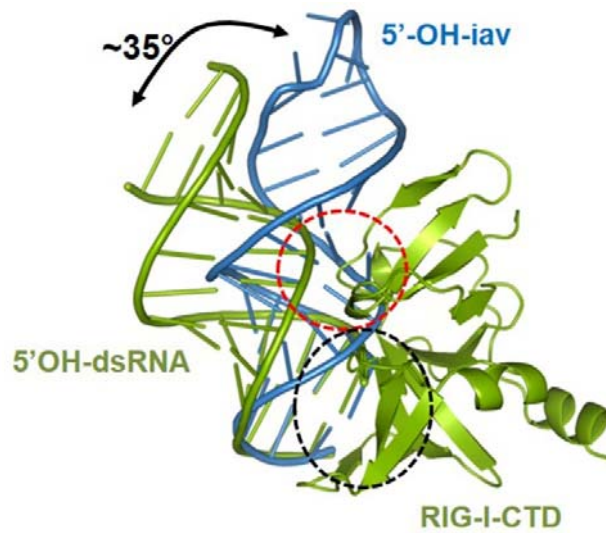

**Figure S6.** Influenza panhandle RNA (blue, PDB 1JO7) was aligned to the bound form of 5'-OH-14bp-GC-dsRNA (green, PDB 3OG8). Influenza RNA was aligned to the terminal 1-4 base pairs of 5'-OH-14bp-GC-dsRNAs in crystal complex. The red circle indicates alternative binding sites between 5'-OH-iav RNA and RIG-I CTD. RIG-I CTD might recognize the RNA's terminal duplex with or without 5'-PPP moiety in black circled region.

**Table S1.** RIG-I-dependent Induction of IFN- $\beta$  by the panhandle RNAs.

| <b>Name</b>   | <b>Ctrl siRNA</b> | <b>RIG-I siRNA</b> |
|---------------|-------------------|--------------------|
| Poly (I:C)    | 12.1 $\pm$ 1.6    | 3.9 $\pm$ 0.3      |
| Medium        | 1.0 $\pm$ 0.1     | 1.8 $\pm$ 0.4      |
| 5'-OH-cont    | 1.0 $\pm$ 0.1     | 1.2 $\pm$ 0.2      |
| 5'-OH-iav     | 7.5 $\pm$ 0.5     | 3.84 $\pm$ 0.02    |
| 5'-PPP-cont   | 9.8 $\pm$ 1.8     | 5.6 $\pm$ 0.1      |
| 5'-PPP-iav    | 9.4 $\pm$ 1.5     | 5.4 $\pm$ 0.2      |
| 5'-OH-Int-NS1 | 13.0 $\pm$ 2.1    | 4.6 $\pm$ 0.4      |
| 5'-OH-Bend-GC | 5.5 $\pm$ 0.8     | 1.3 $\pm$ 0.2      |

**Table S2.** RIG-I-dependent Induction of ISG56 by the panhandle RNAs.

| <b>Name</b> | <b>Ctrl siRNA</b> | <b>RIG-I siRNA</b> |
|-------------|-------------------|--------------------|
| Medium      | 0.10 $\pm$ 0.10   | 0.13 $\pm$ 0.10    |
| 5'-OH-cont  | 0.22 $\pm$ 0.16   | 0.12 $\pm$ 0.08    |
| 5'-OH-iav   | 0.83 $\pm$ 0.30   | 0.20 $\pm$ 0.14    |
| 5'-PPP-cont | 0.97 $\pm$ 0.42   | 0.34 $\pm$ 0.25    |
| 5'-PPP-iav  | 1.00 $\pm$ 0.25   | 0.27 $\pm$ 0.12    |
| 5'-OH-Kink  | 0.76 $\pm$ 0.24   | 0.26 $\pm$ 0.20    |
